# Supplementary material for: The “T’s” of snakebite injury in the USA: fact or fiction?
Source: PubMed Central journal article supplement — Trauma Surg Acute Care Open. 2019 Oct 30;4(1):e000374. doi: 10.1136/tsaco-2019-000374 (PMC6887492; doi:10.1136/tsaco-2019-000374), 2019-10-30
Supplement: tsaco-2019-000374supp001.pdf [file tsaco-2019-000374supp001.pdf]

Supplement- Online Sources Related to “T’s of Snakebites”

Appropriate, effective, and timely response to snake bite. Mountain Project.

<https://www.mountainproject.com/forum/topic/106558721/appropriate-effective-and-timely-response-to-snake-bite>. Accessed June 9, 2019.

Everything you know about snakebites is wrong. • EBM Gone Wild. *Life in the Fast Lane • LITFL • Medical Blog*. December 2018. <https://litfl.com/everything-you-know-about-snakebites-is-wrong/>. Accessed June 9, 2019.

July | 2015 | The Gypsy Carpenters. <http://www.gypsyncarpenters.com/?m=201507>. Accessed June 9, 2019.

Medical Mnemonic: Snakebite Scoring System. SiteDomainName.

[http://knowmedge.com/medical\\_mnemonics/Emergency\\_mnemonics/Snakebite-Scoring-System/1340](http://knowmedge.com/medical_mnemonics/Emergency_mnemonics/Snakebite-Scoring-System/1340). Accessed June 9, 2019.

r/todayilearned - TIL the ‘7 T’s’ associated with snake bite victims: Tattoos, Testosterone, Tequila, T-shirt (usually with a rock band insignia, think Beavis and Butthead), Truck (with gun rack), Teasing the snake and Teeth (missing). reddit.

[https://www.reddit.com/r/todayilearned/comments/3doajx/til\\_the\\_7\\_ts\\_associated\\_with\\_snake\\_bite\\_victims/](https://www.reddit.com/r/todayilearned/comments/3doajx/til_the_7_ts_associated_with_snake_bite_victims/). Accessed June 9, 2019.

Snake bites - WikEM. [https://wikem.org/wiki/Snake\\_bites](https://wikem.org/wiki/Snake_bites). Accessed June 9, 2019.

Start of Rattler Season Puts Snakebite Specialists on Alert. *Los Angeles Times*.

<https://www.latimes.com/archives/la-xpm-2005-may-16-me-snakemd16-story.html>. Published May 16, 2005. Accessed June 9, 2019.

Carol. The 6 T’s of a Snake bite. <http://ipcblog.org/2015/06/16/the-6-ts-of-a-snake-bite/>.

Accessed June 9, 2019.
